# Supplementary material for: Chiron: translating nanopore raw signal directly into nucleotide sequence using deep learning
Source: PubMed Central journal article supplement (PMC5946831; doi:10.1093/gigascience/giy037), 2018-04-10
Supplement: giy037_response_to_reviewer_comments_revision_1.pdf [file giy037_response_to_reviewer_comments_revision_1.pdf]

## **Author's Response To Reviewer Comments**

---

We thank the reviewers for looking at our paper a second time.
